# Supplementary material for: In Silico Design of Saccharomyces cerevisiae Strains for Improved Production of Chondroitin
Source: Preprints.org preprint supplement (doi:10.20944/preprints202312.1479.v1), 2023-12-20
Supplement: Supplementary file 1 [file supplementary]

*In silico* design of *Saccharomyces cerevisiae* strains for improved production of chondroitin

Márcia R. Couto, Joana L. Rodrigues, Oscar Dias and Lígia R. Rodrigues

**Table S1.** Primers used in this study.

| **Purpose** | **Name** | **Template** | **Sequence (5΄ → 3΄)** | **Restriction enzyme** |
| --- | --- | --- | --- | --- |
| Cloning of *Giuae* in pSP-GM1 (PGK1) | Gi_uae_Fw1 | pUC57_Giuae | AAAGGATCCAAAAAAATGCATCACCATCACCATCACCAGAATCATTCCTTCTTGG | *Bam*HI |
| Gi_uae_Rv1 | AAAACTCGAGCTATAATCCAATACCTTTTACATC | *Xho*I |
| Cloning of *Btchsy* in pSP-GM1 (PGK1) | Bt_chsy1_Fw | pUC57_Btchsy1 | AAAGGATCCAAAAAAATGCATCACCATCACCATCACGCTGTCCGAGGTCGAAGAGC | *Bam*HI |
| Bt_chsy1_Rv | AAAACTCGAGTTAAGCCGTGCGGACTGAGC | *Xho*I |
| Cloning of *Giuae* in pSP-GM1_(PTEF) | Giuae_tefp_Fw | pSP-GM1_Giuae | ATTTGCGGCCGCAAAACAATGCATCACCATCACCAT | *Not*I |
| Giuae_tefp_Rv | AACGAGCTCCTATAATCCAATACCTTTTACATC | *Sac*I |
| *Zmugd* cloning in pSP-GM1_tefp_*Giuae* | Zm_psp_Fw | pSP-GM1_Zmugd | AAAGGATCCAAAAAAATGCATCACCATCACCATCACCGCATTACCATGATCGGTTCC | *Bam*HI |
| Zm_psp_Rv | AAAGCTAGCTTACCCTGCATTGGGTCGAC | *Nhe*I |
| *Btchsy* cloning in pBEVY | Btchsy_pBEVY_Fw | pSP-GM1_Btchsy | AACGCGGATCCAAAACAATGCATCACCATCAC | *Bam*HI |
| Btchsy_pBEVY_Rv | AACGCCGTCGACTTAAGCCGTGCGGACTGAGC | *Sal*I |
| *kfoA* cloning in pSP-GM1_Zmugd | kfoA_psp_Fw | pETM6_kfoCA | ATTTGCGGCCGCAAAACAATGAATATATTAGTTACAGGTG | *Not*I |
| kfoA_psp_Rv | AACGAGCTCTTAAATATAACCATTTGGGTTT | *Sac*I |
| *kfoC* cloning in pBEVY-L | kfoC_pBEVY_Fw | pETM6_kfoCA | AACGCGGATCCAAAACAATGAGTATTCTTAATCAAGC | *Bam*HI |
| kfoC_pBEVY_Rv | AACGCCGTCGACTTATAAATCATTCTCTATTTTTTCCC | *Sal*I |
| *Colony PCR and sequencing* | | | | |
|  | tADH1_Fw | pSP-GM1_tefp_Giuae / pSP-GM1_Zmugd_kfoA | CCTAAGAGTCACTTTAAAATTTGT |  |
|  | TEF1p_Rv | CGTACCACTTCAAAACACC |  |
|  | PGK1p_FW | pSP-GM1_Zmugd / pSP-GM1_Giuae_Zmugd | GTGATCTCCAGAGCAAAGT |  |
|  | CYCt_REV | CTTCGAGCGTCCCAAAAC |  |
|  | tADH1_Fw | pBEVY_Btchsy / pBEVY_kfoC | CCTAAGAGTCACTTTAAAATTTGT |  |
|  | pGAL_middle_Rv | ATTATTCCCCTACTTGACTAATAAG |  |
|  | Bt_chsy1_middle | pBEVY_Btchsy | CGGTAAATGTTTAAGAGAGATG |  |
|  | kfoC_pBEVY_Rv | pBEVY_kfoC | AACGCCGTCGACTTATAAATCATTCTCTATTTTTTCCC |  |

**Table S2.** Codon-optimized gene sequences (5΄ → 3΄) for *Saccharomyces cerevisiae.*

| >Chondroitin synthase (chsy1) (2412 bp GC%: 41,54; CAI: 0,74) |
| --- |
| ATGGCTGTCCGAGGTCGAAGAGCATGGTTAAGCGTTTTGCTGGGTTTAGTTCTTGGTTTTGTCTTAGCCTCTAGACTCGTTTTGCCGAGGGCTTCTGAGTTAAAAAGAGCAGGCCCACGGAGAAGAGCTAGTCCAGAGGCTTGTAGGCCGGGTCAGGCAGCAGCCGTACCATTAGCTGGAGGTGCTAGAGGAGATGCGAGAGGCCAAAGATTATGGCCCCACGGGGAAGCTCAAGACGGTGTTCCCCGCGACCGCAATTTCTTATTCGTAGGAGTCATGACCGCTCAAAAGTATCTACAAACGAGAGCTGTGGCTGCTTTCAGAACTTGGTCAAAAACTATCCCAGGCAAGGTCGAATTTTTCTCATCTGAAGGTTCTGATACCAGTATTAGTATTCCTGTGGTCCCATTGCGAGGTGTTGATGATTCATATCCGCCTCAGAAAAAATCATTCATGATGTTAAAATATATGCATGATCATTACTTGGATAAGTACGAATGGTTCATGAGAGCTGACGATGATGTTTATATTAAAGGTGACAGATTGGAATCATTCTTAAGATCGCTCAACAGCAGCGAGCCTTTGTTCTTGGGACAGACCGGCTTAGGAACCACTGAAGAAATGGGAAAACTTGCTCTAGAACCCGGTGAAAACTTTTGCATGGGAGGCCCCGGCGTTATTATGAGCAGAGAAGTATTGAGAAGAATGGTACCTCACATCGGTAAATGTTTAAGAGAGATGTACACTACTCACGAGGATGTAGAGGTGGGTCGCTGCGTTAGAAGATTTGCTGGTGTACAATGCGTCTGGTCGTACGAAATGCAACAACTCTTTTATGAAAATTATGAACAAAATAAAAAAGGTTACATACGTGATTTACACAATTCCAAGATACATAGAGCCATCACCTTACATCCTAACAAAAATCCTCCATATCAATATCGTTTGCACAGCTATATGCTTTCTAGAAAAATCGCTGAACTGAGACATCGTACTATCCAACTGCATCGCGAGATTGTCCTTATGTCCAAGTACAGTAATACGGAAGTTCATAAAGAGGATTTGCAATTAGGTATTCCACCGTCTTTCATGAGATTTCAACCAAGACAAAGAGAAGAAATTTTGGAATGGGAATTTCTAACCGGTAAGTATTTATATAGTGCAGCCGATAGCCAGCCCCCACGTAGAGGTATGGACAGCGCCCAAAGAGAAGCATTGGATGATATTGTTATGCAAGTTATGGAAATGATAAATGCCAATGCCAAAACTAGAGGGAGAATTATAGATTTCAAAGAAATTCAATACGGTTATCGCCGTGTTAATCCGATGTACGGGGCTGAATATATACTGGATTTGTTGTTGCTTTACAAGAAACATAAAGGTAAGAAAATGACAGTTCCAGTTAGAAGACATGCCTATTTGCAACAAACTTTTTCAAAAATTCAGTTTGTTGAACATGAAGAACTTGATGCAAAGGAATTGGCGAATAAAATTAATCAAGAATCCGGCTCCCTGTCTTTCCTGTCCAATTCATTGAAAAAGTTGGTGCCATTTCAACTTCCCGGGAGTAAAAACGAACACAAAGAACCTAAGGAGAAAAAGATTAATATTTTAATCCCCCTGAGCGGAAGATTTGACATGTTTGTCCGTTTCATGGGAAACTTTGAAAAGACATGTTTAATTCCGAATCAAAACGTGAAACTGGTTGTCTTATTGTTTAATTCTGATTCGAACCCTGACAAAGCCAAGCAAGTGGAACTTATGCGTGATTACAGAATTAAATATCCCAAGGCCGATATGCAAATTTTGCCGGTGTCAGGTGAGTTTTCCAGAGCCTTGGCATTGGAGGTGGGCAGTTCTCAATTTAACAATGAGAGTCTTTTGTTTTTCTGTGATGTTGACTTAGTCTTCACGGCCGAGTTTTTGCAACGTTGTAGAGCTAACACTGTCTTAGGCCAACAAATTTACTTCCCTATTATCTTCTCACAATATGATCCTAAAATTGTCTACTCCGGCAAAGTTCCAAGTGATAATCACTTTGCTTTTACTCAGAAAACTGGTTTTTGGAGGAATTATGGATTTGGAATTACGTGTATATACAAAGGGGATTTAGTGAGGGTGGGTGGCTTTGATGTGTCCATCCAGGGTTGGGGTCTGGAAGATGTCGATTTATTCAACAAAGTCGTTCAAGCAGGGCTTAAAACTTTCAGGAGCCAGGAAGTTGGCGTGGTCCACGTACACCATCCTGTTTTTTGTGATCCGAACTTAGATCCTAAGCAATACAAAATGTGTTTGGGCAGTAAAGCCTCCACTTATGGTAGCACTCATCAATTGGCAGAAATGTGGTTAGAAAAAAACGATCCCAATTACTCTAAGTCGAGTAACAACAACGGCTCAGTCCGCACGGCTTAA |
| >UDP-N-acetylglucosamine 4-epimerase (UAE) (1158 bp GC%: 42,31; CAI: 0,77) |
| ATGCAGAATCATTCCTTCTTGGGTAAAACGGTCTTGATCACAGGCGGTTGTGGTTTCATTGGATCTCATTTTGTAGAGGCTTGTCATGTTCTCGGTATGACCGTCTATGTTTTAGATAACCTCAGTTCTGGTAAGAATGTATTTAAGACAACATCTGATTGTTCTTCATCATTGGTTTACACTATCGGTGACATTAGAGACAAGGCTATCTTCTCTAGACTTCCGCAGAAAATTGACTTCGTCATTCATTTGGCCGCAGCTGTTTCTGTTGCCGAATCAGTAACAAATCCGCAGAAATATATGTTAACCAATGTTGAGGGTAGTAGAAACGTTTTCCAGTATGCTGTTGACGCAAAGGCTTCAGCCGTCTTAAGTGCTTCTACTGCTGCATATTACGGCGATTGTGGTAAGTCAGCTATTACCGAGGCTTTCCCCTATGGTGGCATTTCTCCATACGCTGAAAGTAAGATGGAGATGGAGAGATTAGGAGCCGAATTTCAAAAGACATCTCGTTGCAGATTCATTTTCTGCAGATTTTTCAATGTCTACGGCCCTAGACAGGACCCCTCCTCGCCCTACACTGGAGTTATGAGTATTTTTATGGACAGGTGCGCCGCTAGAAAACCGATTACAATCTTTGGTACCGGCGAGCAAACAAGAGATTTTGTTTTCATCAAGGACTTAATTGTCGCTGCCATTAACTTATTAGGTCAATTGGATAAGTTTCCTATTGGAGCAGATGCCGTGCAACAGAACGATCCAGAAGAAGTCCAAAGGTCCGCATATACCGGTGAAGGTGTGTACCCAACTGTTTTCAACATCGGATCGGGAATTTCGATCAGTGTCAATGAGCTTGCTGAATTAGCCAAAATTGTTTCTGGTAGACATGAAGTGGAAATTGTTCATGGAGAACCACGTAGTGGAGACATATTGCATTCATTATCCGATTGCACTAGGATTAGAAACGCTACTGGATGGAGCGCATCTACTACTCTTAGAGTTGGTATGTCTGAAACTTGGGGATGGGCTGCTGGCGAAATTAGTTACTTGTCTGGTGACTTGGTAAGAGTGTTGGAAAACGAATTAAAGATTGATGGGGTTTCAGTAGCAAAATCTCTATGTGGTAAAGATGCAGATGTAAAAGGTATTGGATTATAG |
